1 Estimating physiological tolerances– a comparison of traditional approaches to nonlinear  
2 regression techniques

3

4 Dustin J. Marshall\*<sup>1</sup>, Michael Bode<sup>2</sup> & Craig R. White<sup>3</sup>

5 \*Correspondence: [Dustin.Marshall@monash.edu](mailto:Dustin.Marshall@monash.edu)

6 <sup>1</sup> School of Biological Sciences, Monash University, Victoria, 3800,

7 <sup>2</sup> Department of Botany, University of Melbourne, Victoria, 3052

8 <sup>3</sup> School of Biological Sciences, University of Queensland, Queensland, 4072

9

10 Summary: Traditionally, physiologists have estimated the ability of organisms to withstand  
11 lower partial pressures of oxygen by estimating the partial pressure at which oxygen  
12 consumption begins to decrease (known as the 'critical  $P_{O_2}$ ' or ' $P_C$ '). For almost 30 years, the  
13 principal way in which  $P_C$  has been estimated has been via piecewise 'broken stick' regression.  
14 Broken stick regression (BSR) was a useful approach when more sophisticated analyses were  
15 less available, but BSR makes a number of unsupported assumptions about the underlying form  
16 of the relationship between the rate of oxygen consumption and oxygen availability. The BSR  
17 approach also distils a range of values into a single point with no estimate of error. In  
18 accordance with more general calls to fit functions to continuous data, we propose the use of  
19 nonlinear regression (NLR) to fit various curvilinear functions to oxygen consumption data in  
20 order to estimate  $P_C$ . Importantly, our approach is back-compatible so that estimates using  
21 traditional methods in earlier studies can be compared to data estimates from our technique.  
22 When we compared the performance of our approach relative to the traditional BSR approach  
23 for real world and simulated data, we found that under realistic circumstances, the NLR was  
24 more accurate and provided more powerful hypothesis tests. We recommend that future  
25 studies make use of NLR to estimate  $P_C$ , and also suggest that this approach might be more  
26 appropriate for a range of physiological studies that use BSR currently.

27

28

29

## Introduction

30

31

32

33

34

35

36

37

Understanding the physiological tolerances of an organism to its environment has long been a focus of ecophysiology. Oxygen is a fundamental requirement of most organisms, and its availability may be limiting across a range of habitats (Portner, 2010; Verberk et al., 2011; Ferguson et al. in press). For over 30 years, measures of oxygen tolerance have accumulated in a wide variety of taxa with variation evident at a range of scales (Greenlee and Harrison, 2004a; Mueller and Seymour, 2011; Lease et al., 2012; Ferguson et al., in press). Surprisingly, no clear consensus over how to estimate oxygen tolerance exists, and for the most part, modern statistical approaches have not been brought to bear on this problem.

38

39

40

41

42

43

44

45

46

47

48

49

50

51

52

53

The most common estimate of oxygen tolerance is the critical partial pressure of oxygen for aerobic metabolism ( $P_c$ ), which represents the lowest level of oxygen at which aerobic metabolism is independent of the ambient partial pressure of oxygen ( $P_{O_2}$ ; Hochachka and Somero, 2002). At levels of  $P_{O_2}$  below  $P_c$ , either metabolism cannot be supported by aerobic processes entirely, and metabolic rate decreases; and/or anaerobic processes that are relatively inefficient and produce potentially toxic end-products become increasingly important (Hochachka and Somero, 2002). The original method for estimating  $P_c$  is the 'broken stick' regression (BSR) approach (Yeager and Ultsch, 1989) – an approach that remains the most common today. The broken stick approach to estimating  $P_c$  has been applied in a range of contexts, and been used to demonstrate, for example, that the  $P_c$  of a species is generally matched to the minimum oxygen level encountered in the environment in which it lives (Childress and Seibel, 1998; Nilsson, 2007; Ferguson et al., in press), and that mobile species show behavioural avoidance of oxygen levels below their  $P_c$  (Burleson et al., 2001). Nonetheless, not all species show clear break points in the relationship between rate of oxygen consumption ( $\dot{V}O_2$ ) and  $P_{O_2}$ , which complicates efforts to assess the regulatory ability these species (Mueller and Seymour, 2011).

54           The traditional broken stick regression approach (piecewise linear regression) makes a  
55   number of unsupported assumptions about the underlying relationship between oxygen  
56   availability and respiration rate. First, it assumes that the functional response of an organism to  
57   decreasing partial pressures of oxygen is biphasic, that is, it consists of two linear elements with  
58   a clear break between these two phases. Above  $P_c$ ,  $\dot{V}O_2$  is assumed to be characterised by a linear  
59   function that is completely flat, while below  $P_c$ ,  $\dot{V}O_2$  decreases linearly with  $P_{O_2}$  with an abrupt  
60   transition between these two functions (Chiu et al., 2006). Of course, in reality, rates of  
61   respiration are likely to be a continuous function between these two phases, and furthermore,  
62   concentration-dependent reaction kinetics make a linear relationship between  $\dot{V}O_2$  and  $P_{O_2}$   
63   highly unlikely. As such, the broken stick regression approach does not reflect the underlying  
64   structure of the data, violating the basic assumptions of the regression approach (Quinn and  
65   Keough, 2002). Our discussion here should not be taken as a criticism of the original  
66   progenitors of these approaches: when they were developed, those analyses represented the  
67   best approach available with the statistical and computational tools of the time. Today,  
68   however, more sophisticated approaches are available that better reflect the underlying  
69   processes that generated the data.

70           Since the development of the BSR technique, there have been a number of other ways in  
71   which authors have attempted to estimate  $P_c$ . These approaches have largely been subjective  
72   and lack repeatability (e.g. Portner et al., 1991; Greenlee and Harrison, 2004a, b, Lease et al.,  
73   2012). Ideally, any technique for estimating  $P_c$  should both represent the mechanistic process  
74   by which the data were generated and be repeatable. More generally, there are compelling  
75   reasons for describing continuous traits with functional relationships, rather than taking  
76   isolated point measures (Stinchcombe and Kirkpatrick, 2012). For example, Mueller and  
77   Seymour (2011) fit a nonlinear function to estimate the ability of organisms to regulate oxygen  
78   consumption beyond simple oxy-conformity across a range of oxygen values: they propose a  
79   ‘Regulation Index’, which estimates a relative measure of oxyregulatory ability using either

80 linear, quadratic [ $y = a + bx + cx^2$ ] or one-phase association [ $y = y_0 + (y_{\max} - y_0)(1 - e^{-kx})$ ] fits).  
81 Here, we apply a similar logic for estimating  $P_c$  that meets the above criteria – a nonlinear  
82 regression approach coupled with simple differential calculus. We then evaluate the  
83 performance of this new method relative to the most widely used approach to date, BSR, across  
84 real-world data and explore a broader parameter space using simulations to compare the  
85 sensitivity and reliability of these two approaches. Finally, we examine the statistical power of  
86 the two techniques to distinguish differences in oxygen tolerance among groups.

87

## 88 **Methods**

### 89 *Fits to published data*

90 After examining the form of many published relationships between  $\dot{V}O_2$  and  $P_{O_2}$ , we  
91 settled on six candidate functions that approximated the general relationship well and were  
92 reasonably tractable analytically (Table 1). While other forms could also fit the data and we  
93 encourage investigators to explore alternatives (e.g. a power function with an intercept), we  
94 chose these forms as, on first inspection, they appeared to fit real world data reasonably well  
95 and consistently. We used standard nonlinear regression to fit these functions to published data.  
96 It is beyond the scope of this paper to describe the general theory and approach of nonlinear  
97 regression but we recommend Quinn and Keough (2002; pg 150) for a general introduction and  
98 Ritz and Streibig (2008) for an excellent primer in how to implement this analysis in the freely  
99 available statistical software R (R Development Core Team 2012). The nonlinear regression  
100 analysis provides estimates of between two and four parameters (or even more if a selected  
101 function has more): with these values the relationship between  $\dot{V}O_2$  and  $P_{O_2}$  can be visualised.  
102 For ease of use and comparison among studies, however, a single metric that best represents  $P_c$   
103 is desirable. Such a metric must be repeatable and objective. We based our metric on the  
104 underlying principles of what  $P_c$  seeks to describe: the point where  $\dot{V}O_2$  is no longer strongly

105 affected by  $P_{O_2}$ . In other words, when the slope of the function begins to flatten out and  
106 approach zero. As the absolute values of a slope will vary according to the maximum oxygen  
107 consumption rate of that particular organism, we first standardised our data by the maximum  
108  $\dot{V}O_2$  observed for any set of values ( $\dot{V}O_2 \text{ max} = 1$ ). By standardising, we can choose one slope  
109 value and compare where that value occurs among individuals, species and studies.

110

111 The slope across function is, of course, given by the first derivative of the original function and  
112 the derivative for each function is shown in Table 1. After rearranging we can solve for the  
113 partial pressure  $P_c$ , at which any slope value (here, denoted  $m$ ), and these are shown in Table 1.  
114 We explored a range of values of  $m$  and found that a slope of  $m = 0.065$  best approximates  $P_c$   
115 such that the solved values for  $P_c$  are shown in Table 2.

116 We coupled this formula to our nonlinear regression (NLR) estimates of  $a$ ,  $b$ ,  $c$  and  $d$  as  
117 appropriate to estimate the value of  $P_c$  for a range of published data from the literature (see  
118 Table 2). NLR relationships with additive error structures were fitted using the 'nls' function in  
119 R v2.15.0 (R Development Core Team 2012), and NLR relationships with multiplicative error  
120 structures were fitted using the 'gnls' function. The NLR and BSR fits to each data set were then  
121 compared on the basis of Akaike's Information Criterion as a measure of model fit; the fit with  
122 the lowest AIC was considered the best of the candidate set of models, given the data (Burnham  
123 and Anderson 2008). We then also compared the performance of the NLR approach to the  
124 broken stick method across a range of parameter values to evaluate how each approach coped  
125 with differences in variation and sampling resolution with a simulation approach.

#### 126 *Simulation methods*

127 We explored the influence of a suite of characteristics of the relationship between  $V_{O_2}$  and  $P_{O_2}$   
128 on NLR- and broken stick regression (BSR) derived estimates of  $P_c$  using Monte Carlo  
129 simulations. We began by generating a function relating  $\dot{V}O_2$  to  $P_{O_2}$  that was explicitly biphasic,

130 incorporating two linear portions (one that increased with  $P_{O_2}$  until  $P_{O_2} = P_c$ , and a second that  
131 was independent of  $P_{O_2}$  at  $P_{O_2}$  levels greater than  $P_c$ ).  $P_c$  was set at 5 kPa and  $\dot{V}O_2$  above  $P_c$  was  
132 set at 1. We then repeatedly simulated the process of sampling these data, and estimating the  
133 value of  $P_c$  by fitting both the BSR and NLR. We elected to use a biphasic function because it  
134 reflects the underlying assumption of the BSR approach, and because fitting such data should  
135 represent the greatest challenge to NLR. Put simply, if NLR outperforms BSR, even when the  
136 function is biphasic, then there can be little justification for preferring BSR over NLR, and as  
137 such our approach was highly conservative. We sampled the relationship between  $\dot{V}O_2$  and  $P_{O_2}$   
138 at a range of resolutions (0.125, 0.25, 0.5, 1 kPa). To each  $\dot{V}O_2$ , we then added a normal deviate  
139 with a mean of zero and coefficient of variation (= s.d. divided by  $\dot{V}O_2$ ) of 0.025, 0.05, 0.1, 0.15, or  
140 0.20. These values for the CV of  $\dot{V}O_2$  were selected to span the range of observed values of CV in  
141 real data (n = 10, mean = 0.09, range: 0.04 – 0.21; See references in Table 1). 1000 such data  
142 sets were generated for each combination of sampling resolution and CV, and  $P_c$  was estimated  
143 using both NLR and BSR techniques. NLR estimates of  $P_c$  were derived as described above by  
144 fitting a Weibull function to each data set (excluding that of *Cryptobranchus* as the model would  
145 not converge) using the 'nls' function in R v2.15.0 (R Development Core Team 2012) to obtain a  
146 non-linear least squares fit using a Gauss-Newton algorithm. We used the Weibull function as  
147 this function best fit the most published relationships in the literature (see Results). BSR  
148 estimates of  $P_c$  were obtained by simultaneously fitting two linear regressions constrained to  
149 meet at a specified  $P_{O_2}$ ,  $P_c$ . The slope of the linear regression below the specified  $P_c$  was a free  
150 parameter, whereas the slope above the specified  $P_{O_2}$  was set at zero. Beginning at the third-  
151 lowest  $P_{O_2}$  in the data set, a series of specified values of  $P_{O_2}$  were trialled, with each successive  
152  $P_{O_2}$  being 0.01 kPa greater than the last until the third highest  $P_{O_2}$  in the data set was reached.  
153 The value of the  $P_{O_2}$  break point that minimised the sum of squared deviations from the  
154 biphasic function was considered to represent  $P_c$ .

155 *Testing for differences among groups*

156 We compared the ability of our best fitting NLR and BSR to identify differences among groups  
157 that differ in  $P_c$  with Monte Carlo Simulations. For two groups of 6 simulated datasets, each  
158 with  $P_{O_2}$  values sampled at 1 kPa resolution, we generated a relationship between  $\dot{V}O_2$  and  $P_{O_2}$   
159 that included a break point ( $P_c$ ) at either 6.5 kPa (group 1) or 8.5 kPa (group 2). As a  
160 conservative measure, these values of  $P_c$  were deliberately chosen to be different from the  $P_c$  at  
161 which NLR performs best. As above, for each data set  $\dot{V}O_2$  increased linearly with  $P_{O_2}$  to equal 1  
162 when  $P_{O_2} = P_c$ . For values of  $P_{O_2}$  above  $P_c$ ,  $\dot{V}O_2$  was independent of  $P_{O_2}$  and equal to 1. To each  
163 value of  $\dot{V}O_2$  we then added a normal deviate with a mean of zero and coefficient of variation (=   
164 s.d. divided by  $\dot{V}O_2$ ) of 0.10. We then estimated  $P_c$  for each of the data sets using BSR or NLR with  
165  $m = 0.065$ , and tested for differences among groups using  $t$  tests. We also tested for differences  
166 among groups using the best fitting NLR regression by pooling data sets for each group, and  
167 testing for the significance of a fixed grouping factor using likelihood ratio tests. This simulation  
168 procedure was repeated 1000 times, and statistical power was estimated by calculating the  
169 proportion of tests that reported a significant difference among groups with  $\alpha$  set at 0.05.

170

## 171 **Results**

172 *Fits to published data*

173 Both techniques provide a good fit to real-world data (Figure 1), and the predicted  $P_c$   
174 based on NLR was strongly correlated with the  $P_c$  estimates based on BSR ( $R^2 = 0.82$ ,  $n = 13$ ,  $P <$   
175  $0.001$ ), though the relationship was not precisely one to one (Regression equation:  $P_{c(NLR)} =$   
176  $0.646 \times P_{c(BSR)} + 1.12$ ). Neither consistently over- or under-estimated the other, rather the  
177 relationship between the two was idiosyncratic (Figure 2). In eight out the 13 cases, the NLR



178 approach provided a better fit to the data than did the BSR approach (Table 2). For the  
179 remaining 5 cases where the BSR approach had a lower AIC, the differences in AIC between the  
180 BSR and NLR approaches were equivocal ( $\Delta$ AIC around 2) in two cases. For nine out of thirteen  
181 of the cases, the Weibull function (either with or without an intercept) provided a better fit to  
182 the data than any other nonlinear function. For the four remaining cases, each of the other four  
183 nonlinear functions provided the best fit for one case, suggesting that all should be considered  
184 candidate functions in future studies.

### 185 *Simulations*

186 The best fitting NLR was far more robust to variation in the data than was the BSR  
187 (Figure 3). While both performed well when variation was very low and sampling resolution  
188 very high, the broken stick technique was far more likely to dramatically misestimate  $P_c$  when  
189 variance was high. The NLR also coped with lower sampling resolution relative to the BSR: at  
190 sampling resolutions greater than 0.5 kPa, the error rate of the BSR increased dramatically with  
191 this approach being far more likely to misestimate  $P_c$ . For the BSR, the effects of sampling  
192 resolution and error interacted such that the most error-prone estimates came from simulated  
193 data with high levels of variation and low sampling resolutions (Figure 3). In contrast, neither  
194 resolution nor variation had strong effects on the error rate of the NLR technique.

### 195 *Testing for differences among groups*

196 Power to detect differences among groups was lowest for  $t$ -tests comparing BSR-derived  
197 estimates of  $P_c$  (0.63), and was higher for  $t$ -tests comparing best NLR-derived estimates of  $P_c$   
198 (0.74); power was also relatively higher for comparisons of pooled data made using likelihood  
199 ratio tests (0.83).

200

201

202

## Discussion

203

204

205

206

207

208

209

210

211

212

213

214

215

216

217

218

219

220

221

222

223

224

225

226

227

For both real-world and simulated data, a nonlinear regression (NLR) approach to estimating tolerance to decreasing availability to oxygen was superior to a broken stick regression (BSR) approach in almost every regard. The NLR approach was more robust to variation in the data and reductions in sampling resolution, as well as offering a more powerful means of detecting differences between groups. Our simulations suggest that BSR has a tendency to overestimate  $P_c$  when data are variable, sampling resolutions are low and the underlying 'true'  $P_c$  is low. It is possible therefore that some species may be more tolerant to low oxygen conditions than is currently appreciated. NLR performed less well in simulations when the underlying  $P_c$  was close to the highest  $P_c$  measured in the study and in this instance, BSR was a more accurate indicator of the  $P_c$ . The poor performance of NLR in this parameter space was due to the relationship between  $\dot{V}O_2$  and  $PO_2$  being linear in our simulations (recall that we used an artificially biphasic function) and as such, it was inevitable that the nonlinear function fit the data poorly. We therefore favour the use of NLR over BSR despite this shortcoming because in nature, very high  $P_c$ s are very rare, and genuinely linear relationships between  $\dot{V}O_2$  and  $PO_2$  are similarly rare. Nevertheless, we suggest that visual inspections of the data be conducted before  $P_c$ s are estimated and on the rare occasions when the relationship between  $\dot{V}O_2$  and  $PO_2$  appears to be linear, linear regression be used instead of NLR. In other words, as for any statistical model fitting exercise, the underlying form of the relationship should dictate the form of the model that is fit (Quinn and Keough, 2002).

The use of NLR to estimate tolerance to low oxygen carries the additional advantage of allowing formal testing for differences among groups within the same statistical framework. Traditionally, comparisons of  $P_c$  among species, individuals or groups have involved estimating  $P_c$ s within groups using the BSR approach, using these estimates of  $P_c$  as individual data points and then using a separate statistical test to detect differences (e.g. Ferguson et al., in press). There are a number of disadvantages to this two-stage approach. First, estimating the  $P_c$  as a

228 summary statistic for the entire function results in significant loss of information – essentially, a  
229 large amount of data is collected to estimate a single point, and then the bulk of the data are  
230 ignored in the hypothesis test (Stinchcombe and Kirkpatrick, 2012). Second, using the  $P_c$   
231 summary statistic ignores error and variance associated with this estimate, the subsuming of  
232 error will result in hypothesis tests that are more susceptible to Type I errors (Hadfield et al.,  
233 2010). In contrast, formal hypothesis tests of differences across entire functions among groups  
234 allow the use of the full complement of data that were collected as well as incorporating the  
235 appropriate error into the hypothesis test of interest (Stinchcombe and Kirkpatrick, 2012).  
236 Furthermore, the NLR method could be extended to include random effects, whereby error  
237 associated with different experimental equipment or different measurement days could be  
238 partitioned, increasing the sensitivity of this analytical approach and providing much greater  
239 scope to incorporate additional factors.

240

241 As well as the statistical advantages described above, the use of NLR affords practical  
242 advantages for comparisons among studies and meta-analyses. For example, studies from  
243 different research groups may not sample  $\dot{V}O_2$  at identical values of  $P_{O_2}$  and may sample with  
244 different resolutions. Our simulations show that differences in sampling resolution will result in  
245 systematic differences in the estimate of  $P_c$  and furthermore, the estimate of  $P_c$  will be a product  
246 of the  $P_{O_2}$ s at which  $\dot{V}O_2$  was measured. In contrast, an NLR approach is robust to these  
247 differences in sampling regime, allowing more comparable estimates of  $P_c$  among studies, as  
248 well as estimates of  $\dot{V}O_2$  across a greater parameter space. Furthermore, no single function fit the  
249 data best such that comparisons among studies could be problematic. The retention of an  
250 estimate of  $P_c$  in the context of our approach provides a means of comparing equivalent slopes  
251 among studies that have fit very different functions.

252

253 We chose a point (where  $dV/dP = m = 0.065$ ) on our function that best approximated the  
254  $P_c$  estimated by the BSR approach. We chose this point so that future studies can provide  
255 estimates of oxygen tolerance that are comparable with traditional measures of  $P_c$ . In practice,  
256 we recommend that future studies that utilise the NLR approach present estimates of not only  
257  $P_c$ , but also estimates of function parameters (i.e. estimates of  $a$ ,  $b$ ,  $c$  and  $d$ , as appropriate), as  
258 well as their associated error, as these values will allow comparisons across the entire range of  
259 oxygen partial pressures. Standardised estimates of parameters in selection in evolutionary  
260 biology have facilitated important insights from meta-analyses (Kingsolver et al., 2001), and we  
261 hope similarly valuable insights might become available via the widespread use of the  
262 standardised approach we recommend here.

263 The use of approaches such as BSR to estimate biological ‘thresholds’ in nonlinear  
264 responses more generally is increasingly being scrutinized. The estimation of ecological  
265 thresholds using BSR techniques has been called into question (Toms and Lesperance, 2003), as  
266 has the distillation of continuous functions into single points in evolutionary studies  
267 (Stinchcombe and Kirkpatrick, 2012). Generally, the failure to use nonlinear functions to  
268 describe nonlinear traits results in less powerful, less accurate estimates (Griswold et al., 2008).  
269 BSR techniques are also used to estimate changes in developmental rates across temperatures  
270 (Stanwell-Smith and Peck, 1998), as well as cardinal temperatures (estimates maximum,  
271 minimum and optimal temperature), and we suspect that NLR techniques may be more  
272 appropriate in these settings as well. While BSR techniques were once a pragmatic recognition  
273 of limited computing power and statistical programming, today we have unprecedented access  
274 to powerful statistical estimation techniques with freely available statistical software. We join  
275 others (Stinchcombe and Kirkpatrick 2012) in calling for the increased uptake of ‘function  
276 valued’ approaches to estimating continuous traits such as the relationship between  $\dot{V}O_2$  and  $PO_2$ .

277 **Acknowledgements:** We thank Hayley Cameron, Amy Hooper, Marcelo Lagos Orostica and Matthew Thompson for  
278 help in preparing the manuscript. Two anonymous reviewers provided extremely thoughtful and helpful comments  
279 that improved the manuscript.

280 Funding: DJM, MB and CRW are all supported by grants from the Australian Research Council.

281  
282  
283  
284  
285  
286  
287  
288  
289  
290  
291  
292  
293  
294  
295  
296  
297  
298  
299  
300  
301  
302  
303  
304  
305  
306  
307  
308  
309  
310  
311  
312  
313  
314  
315  
316  
317  
318  
319  
320  
321  
322  
323  
324  
325  
326  
327  
328  
329  
330  
331  
332

Literature Cited

Burleson, M.L., Wilhelm, D.R. & Smatresk, N.J. (2001) The influence of fish size on the avoidance of hypoxia and oxygen selection by largemouth bass. *Journal of Fish Biology*, **59**, 1336-1349.

Burnham, K. P. & D. R. Anderson (2008) *Model selection and multi-model inference: a practical information-theoretic approach*. 2nd edition. Springer, New York

Cassin, S. (1963) Critical oxygen tensions in newborn, young and adult mice. *American Journal of Physiology*, **205**, 325-330.

Childress, J.J. & Seibel, B.A. (1998) Life at stable low oxygen levels: adaptations of animals to oceanic oxygen minimum layers. *Journal of Experimental Biology*, **201**, 1223-1232.

Chiu, G., Lockhart, R. & Routledge, R. (2006) Bent-cable regression theory and applications. *Journal of the American Statistical Association*, **101**, 542-553.

Ferguson, N., White, C.W & Marshall, D.J. (in press) Competition in benthic marine invertebrates: the unrecognised role of exploitative competition for oxygen. *Ecology*.

Greenlee, K.J. & Harrison, J.F. (2004a) Development of respiratory function in the American locust *Schistocerca americana* I. Across-instar effects. *Journal of Experimental Biology*, **207**, 497-508.

Greenlee, K.J. & Harrison, J.F. (2004b) Development of respiratory function in the American locust *Schistocerca americana* II. Within-instar effects. *Journal of Experimental Biology*, **207**, 509-517.

Griswold, C.K., Gomulkiewicz, R. & Heckman, N. (2008) Hypothesis testing in comparative and experimental studies of function-valued traits. *Evolution*, **62**, 1229-1242.

Hadfield, J.D., Wilson, A.J., Garant, D., Sheldon, B.C. & Kruuk, L.E.B. (2010) The Misuse of BLUP in Ecology and Evolution. *American Naturalist*, **175**, 116-125.

Hochachka, P.W. & Somero, G.N. (2002) *Biochemical Adaptation: Mechanism and Process in Physiological Evolution*. Oxford University Press, New York.

Kingsolver, J.G., Hoekstra, H.E., Hoekstra, J.M., Berrigan, D., Vignieri, S.N., Hill, C.E., Hoang, A., Gibert, P. & Beerli, P. (2001) The strength of phenotypic selection in natural populations. *American Naturalist*, **157**, 245-261.

Lease, H.M., Klok, C.J., Kaiser, A. & Harrison, J.F. (2012) Body size is not critical for critical PO<sub>2</sub> in scarabaeid and tenebrionid beetles. *Journal of Experimental Biology*, **215**, 2524-2533.

Mickel, T.J. & Childress, J.J. (1982) Effects of pressure and pressure acclimation on activity and oxygen consumption in the bathypelagic mysid *Gnathophausia ingens*. *Deep-Sea Research Part a-Oceanographic Research Papers*, **29**, 1293-1301.

Mueller, C.A. & Seymour, R.S. (2011) The Regulation Index: a new method for assessing the relationship between oxygen consumption and environmental oxygen. *Physiological and Biochemical Zoology*, **84**, 522-532.

Nilsson, G.E. (2007) Gill remodeling in fish - a new fashion or an ancient secret? *Journal of Experimental Biology*, **210**, 2403-2409.

Peck, L.S., Portner, H.O & Hardewig, I. 2002. Metabolic demand, oxygen supply, and critical temperatures in the antarctic bivalve *Laternula elliptica*. *Physiological and Biochemical Zoology*, **75**, 123-133.

Portner, H.O. (2010) Oxygen- and capacity-limitation of thermal tolerance: a matrix for integrating climate-related stressor effects in marine ecosystems. *Journal of Experimental Biology*, **213**, 881-893.

Portner, H.O., Maclatchy, L.M. & Toews, D.P. (1991) Metabolic responses of the toad *bufo marinus* to environmental hypoxia: an analysis of the critical PO<sub>2</sub>. *Physiological Zoology*, **64**, 836-849.

Quinn, G.P. & Keough, M.J. (2002) *Experimental design and data analysis for biologists*. Cambridge University Press, Cambridge.

Ritz, C. & Streibig, J.C. (2008) *Nonlinear regression with R*. Springer Science+Business Media,

- 333 Stanwell-Smith, D. & Peck, L.S. (1998) Temperature and embryonic development in relation to  
334 spawning and field occurrence of larvae of three Antarctic echinoderms. *Biological*  
335 *Bulletin*, **194**, 44-52.
- 336 Steffensen, J.F., Schurmann, H. & Bushnell, P.G. (1994) Oxygen consumption in four species of  
337 teleosts from Greenland: no evidence of metabolic cold adaptation. *Polar Biology*, **14**, 49-  
338 54.
- 339 Stinchcombe, J.R. & Kirkpatrick, M. (2012) Genetics and evolution of function-valued traits:  
340 understanding environmentally responsive phenotypes. *Trends in Ecology and Evolution*,  
341 **27**, 637-647.
- 342 Toms, J.D. & Lesperance, M.L. (2003) Piecewise regression: a tool for identifying ecological  
343 thresholds. *Ecology*, **84**, 2034-2041.
- 344 Ultsch, G.R., Ott, M.E & Heisler, N. (1980) Standard metabolic rate, critical oxygen tension and  
345 aerobic scope for spontaneous activity of trout (*salmo gairdneri*) and carp (*cyprinus*  
346 *carpio*) in acidified water. *Comparative Biochemistry and Physiology Part a-Physiology*,  
347 **67**, 329-335.
- 348 Verberk, W., Bilton, D.T., Calosi, P. & Spicer, J.I. (2011). Oxygen supply in aquatic ectotherms:  
349 partial pressure and solubility together explain biodiversity and size patterns. *Ecology*,  
350 **92**, 1565-1572.
- 351 Yeager, D.P. & Ultsch, G.R. (1989) Physiological regulation and conformation: a basic program  
352 for the determination of critical points. *Physiological Zoology*, **62**, 888-907.
- 353

354 Figure 1. Relationship between partial pressure of oxygen ( $PO_2$ ) and oxygen consumption ( $VO_2$ )  
355 for a) *Necturus maculosus* (y-axis shows  $\mu\text{L}\cdot\text{g}^{-1}\cdot\text{h}^{-1}$ ) and b) *Crinia georgiani* tadpoles (y-axis  
356 shows  $\text{nanomoles}\cdot\text{h}^{-1}$ ). Line shows predicted line of best fit from nonlinear regression (NLR),  
357 dashed lines show lines of best fit from broken stick regression (BSR) red and blue lines show  
358 critical oxygen value ( $P_c$ ) as estimated by BSR and NLR approaches respectively.

359

360 Figure 2. The relationship between  $P_c$  calculated using nonlinear regression and broken stick  
361 regression approaches. Each point represents a separate species.

362

363 Figure 3. Effect of sampling resolution and variation in the underlying data on the standard  
364 error of the estimates of  $P_c$  for: a) broken stick regression; and b) Nonlinear regression  
365 approaches.

366

367

368

369

370

371

372

373

374

375

376 Table 1. Compilation of functions (and their derivatives) fit to relationships between partial  
 377 pressure of oxygen ( $PO_2$ ) and oxygen consumption ( $\dot{V}O_2$ ) where  $a, b$  and  $c$  are constants to be  
 378 estimated. All have approximately similar forms and all fit published data reasonably well. We  
 379 also present the function for calculating a particular slope ( $m$  – see main text for details) for  
 380 calculating critical oxygen value ( $P_c$ ).

|                        | Function                                                                       | Derivative                                                                                                                                  | Critical oxygen partial pressure                     |
|------------------------|--------------------------------------------------------------------------------|---------------------------------------------------------------------------------------------------------------------------------------------|------------------------------------------------------|
| Michaelis-Menten       | $\dot{V}_{O_2} = \frac{aP_{O_2}}{b + P_{O_2}}$                                 | $\frac{d\dot{V}_{O_2}}{dP_{O_2}} = \frac{ab}{(P_{O_2} + b)^2}$                                                                              | $P_c = \sqrt{\frac{ab}{m}} - b$                      |
| Power                  | $\dot{V}_{O_2} = aP_{O_2}^b$                                                   | $\frac{d\dot{V}_{O_2}}{dP_{O_2}} = abP_{O_2}^{b-1}$                                                                                         | $P_c = \left(\frac{m}{ab}\right)^{\frac{1}{b-1}}$    |
| Hyperbola              | $\dot{V}_{O_2} = \frac{aP_{O_2}}{b + P_{O_2}} + c$                             | $\frac{d\dot{V}_{O_2}}{dP_{O_2}} = abP_{O_2}^{-b-1}$                                                                                        | $P_c = \sqrt{\frac{ab}{m}} - b$                      |
| Pareto                 | $\dot{V}_{O_2} = 1 - (aP_{O_2})^b$                                             | $\frac{d\dot{V}_{O_2}}{dP_{O_2}} = a^b b P_{O_2}^{b-1}$                                                                                     | $P_c = \left(\frac{m}{a^b b}\right)^{\frac{1}{b-1}}$ |
| Weibull                | $\dot{V}_{O_2} = a \left(1 - e^{-\left(\frac{P_{O_2}}{b}\right)^c}\right)$     | $\frac{d\dot{V}_{O_2}}{dP_{O_2}} = a \left(\frac{c}{b}\right) \left(\frac{P_{O_2}}{b}\right)^{(c-1)} e^{-\left(\frac{P_{O_2}}{b}\right)^c}$ | See note                                             |
| Weibull with intercept | $\dot{V}_{O_2} = a \left(1 - e^{-\left(\frac{P_{O_2}}{b}\right)^c}\right) + d$ | $\frac{d\dot{V}_{O_2}}{dP_{O_2}} = a \left(\frac{c}{b}\right) \left(\frac{P_{O_2}}{b}\right)^{(c-1)} e^{-\left(\frac{P_{O_2}}{b}\right)^c}$ | See note                                             |

381 Note: Because there is no unique  $P_c$  for any given value of  $m$  in the Weibull functions,  $P_c$  is estimated  
 382 numerically for these functions by finding the value of  $PO_2$  closest to the highest in the data set where the  
 383 calculated derivative is equal to  $m$ .

384

385

386

387



388 Table 2. Compilation of estimates of fit (AIC values shown in italics) for both broken stick regression and nonlinear regression for a range of  
 389 candidate functions. Note that models with both additive or multiplicative error were fit to each relationship and the AIC values for each are shown  
 390 here. Columns on the right show the estimated critical oxygen value ( $P_c$ ) for both the BSR approach and the best fitting NLR approach. Lowest AIC  
 391 values are shown in **bold** as are the estimated  $P_c$  from the best fitting model. 'NA' indicates that model would not converge and no estimate could be  
 392 made.

| Species                                              | Study                       | AIC value        |                      |                |                      |                |                      |                |                      |                |                      |                        |                      | Summary      |              |
|------------------------------------------------------|-----------------------------|------------------|----------------------|----------------|----------------------|----------------|----------------------|----------------|----------------------|----------------|----------------------|------------------------|----------------------|--------------|--------------|
|                                                      |                             | Michaelis-Menten |                      | Power          |                      | Hyperbola      |                      | Pareto         |                      | Weibull        |                      | Weibull with intercept |                      | Pcrit        |              |
|                                                      |                             | Additive error   | Multiplicative error | Additive error | Multiplicative error | Additive error | Multiplicative error | Additive error | Multiplicative error | Additive error | Multiplicative error | Additive error         | Multiplicative error | BS           | BestNLR      |
| <i>Necturus maculosus</i> (salamander)               | (Yeager and Ultich 1989)    | <i>-97.06</i>    | <i>-100.58</i>       | <i>-73.42</i>  | <i>-90.97</i>        | NA             | NA                   | <i>-112.20</i> | <i>-110.63</i>       | <i>-123.01</i> | <i>-121.08</i>       | <i>-132.30</i>         | <b>-133.13</b>       | <b>6.40</b>  | 5.26         |
| <i>Crinia georgiana</i> , after hatching (frog)      | (Cassin 1963)               | <i>-191.51</i>   | <i>-189.94</i>       | <i>-161.15</i> | <i>-159.22</i>       | NA             | NA                   | <i>-179.91</i> | <i>-185.91</i>       | <b>-211.30</b> | <i>-209.48</i>       | <i>-210.99</i>         | <i>-209.12</i>       | 14.41        | <b>6.27</b>  |
| <i>Gnathopausia ingens</i> (crab)                    | (Cassin 1963)               | <i>-9.55</i>     | <i>-18.50</i>        | <i>-8.41</i>   | <i>-17.33</i>        | NA             | NA                   | <i>-20.39</i>  | <i>-5.62</i>         | <i>-26.15</i>  | <i>-46.10</i>        | <i>-26.59</i>          | <b>-59.15</b>        | 12.53        | <b>11.19</b> |
| Carp, pH 7.9                                         | (Peck et al., 2002)         | NA               | NA                   | <i>-9.75</i>   | <i>-29.56</i>        | NA             | NA                   | <i>-7.65</i>   | <i>-5.69</i>         | <i>-25.53</i>  | <i>-32.80</i>        | <i>-26.15</i>          | <b>-53.27</b>        | 14.62        | <b>12.78</b> |
| Trout, pH 8                                          | (Mueller and Seymour 2011)  | <i>-25.66</i>    | <i>-24.27</i>        | <i>-23.19</i>  | <i>-21.86</i>        | <i>-24.16</i>  | <i>-22.81</i>        | <i>-15.19</i>  | <i>-13.27</i>        | <b>-26.27</b>  | <i>-24.49</i>        | <i>-25.88</i>          | <i>-24.13</i>        | <b>10.23</b> | 6.86         |
| <i>Cryptobranchus alleganiensis</i> (salamander)     | (Mueller and Seymour 2011)  | NA               | NA                   | <b>-52.75</b>  | <i>-51.04</i>        | NA             | NA                   | <i>-6.11</i>   | <i>-4.03</i>         | NA             | NA                   | NA                     | NA                   | 16.11        | <b>12.19</b> |
| Adult mouse (25C)                                    | (Mueller and Seymour 2011)  | <i>-35.52</i>    | <i>-34.92</i>        | <i>-20.04</i>  | <i>-22.95</i>        | <i>-51.35</i>  | <i>-52.84</i>        | <i>-49.06</i>  | <i>-47.21</i>        | <i>-65.59</i>  | <b>-65.64</b>        | <i>-64.67</i>          | <i>-64.04</i>        | <b>3.67</b>  | 4.16         |
| Neonate mouse (25C)                                  | (Mueller and Seymour 2011)  | <i>-67.89</i>    | <i>-66.20</i>        | <i>-57.80</i>  | <i>-57.87</i>        | <b>-73.68</b>  | <i>-73.05</i>        | <i>-58.02</i>  | <i>-55.81</i>        | <i>-68.06</i>  | <i>-66.71</i>        | <i>-71.36</i>          | <i>-70.66</i>        | 7.28         | <b>5.22</b>  |
| <i>Laternula elliptica</i> (Antarctic bivalve)       | (Mickel and Childress 1982) | <b>-88.87</b>    | <i>-88.22</i>        | <i>-64.16</i>  | <i>-68.69</i>        | <i>-87.01</i>  | <i>-87.22</i>        | <i>-60.68</i>  | <i>-63.92</i>        | <i>-85.50</i>  | <i>-85.92</i>        | <i>-83.89</i>          | <i>-84.05</i>        | 3.74         | <b>3.10</b>  |
| <i>Pseudophyrne bibroni</i> , before hatching (frog) | (Ultich et al., 1980)       | <i>-17.07</i>    | <i>-15.21</i>        | <i>-4.08</i>   | <i>-18.48</i>        | <i>-17.38</i>  | <i>-19.74</i>        | <i>-14.47</i>  | <i>-13.22</i>        | <i>-35.95</i>  | <b>-37.08</b>        | <i>-34.80</i>          | <i>-35.30</i>        | <b>1.72</b>  | 2.12         |
| <i>Pseudophyrne bibroni</i> , after hatching (frog)  | (Ultich et al., 1980)       | <i>-19.31</i>    | <i>-21.55</i>        | <i>-9.25</i>   | <i>-18.95</i>        | NA             | NA                   | <i>-28.51</i>  | <b>-34.25</b>        | <i>-32.59</i>  | <i>-30.61</i>        | <i>-30.80</i>          | <i>-31.57</i>        | 2.42         | <b>2.67</b>  |
| <i>Crinia georgiana</i> , before hatching (frog)     | (Steffensen et al., 1994)   | <i>-32.95</i>    | <i>-80.55</i>        | <i>-19.60</i>  | <i>-62.06</i>        | NA             | NA                   | <i>-75.48</i>  | <i>-84.15</i>        | <i>-106.47</i> | <i>-104.50</i>       | <b>-107.71</b>         | <i>-106.38</i>       | <b>3.08</b>  | 3.16         |
| Greenland Cod, <i>Gadus ogac</i>                     | (Yeager and Ultich 1989)    | <i>-54.98</i>    | <i>-58.88</i>        | <i>-37.74</i>  | <i>-49.47</i>        | NA             | NA                   | <i>-69.47</i>  | <i>-74.53</i>        | <i>-100.17</i> | <i>-103.49</i>       | <i>-98.81</i>          | <b>-105.86</b>       | 7.53         | <b>6.63</b>  |

393

394

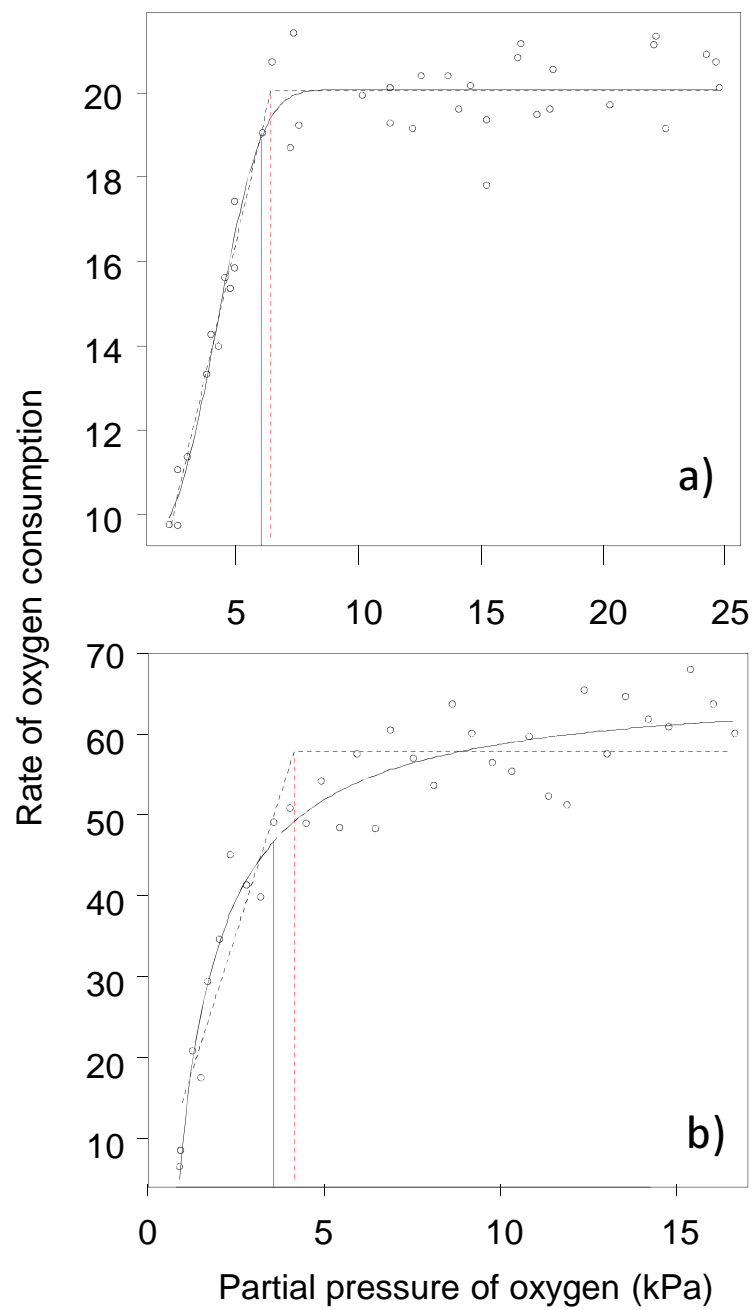

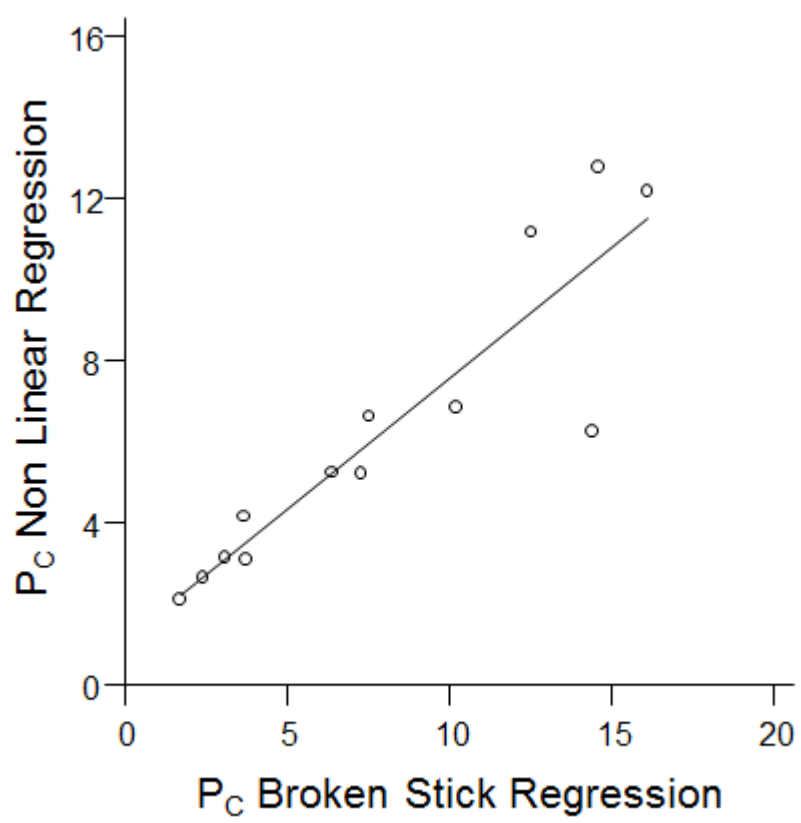

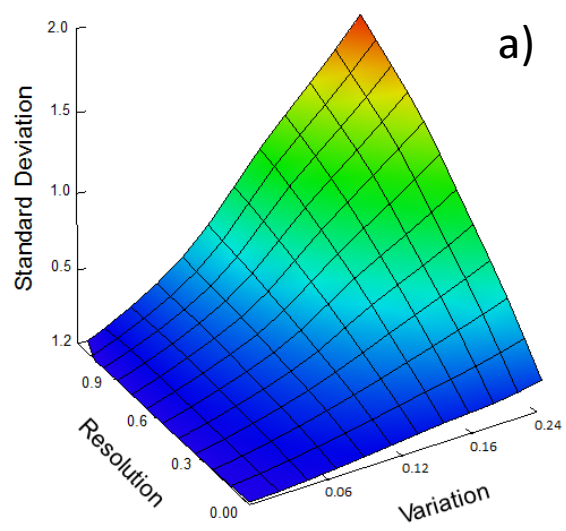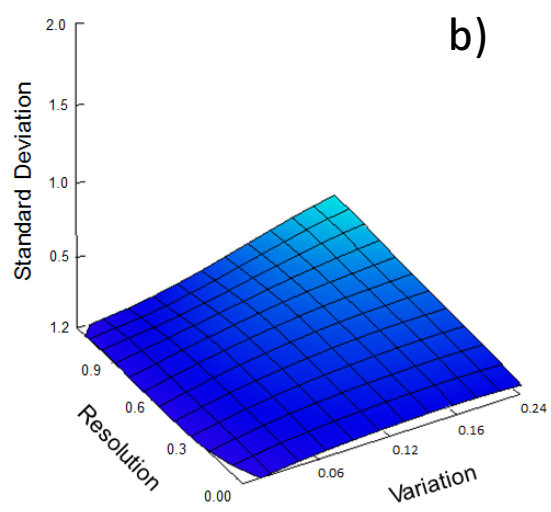

Source: https://cob.silverchair.com/jeb/article-pdf/doi/10.1242/jeb.085712/2036684/jeb_085712.pdf
